# Supplementary material
Source: PubMed Central journal article supplement (PMC8115363)
Supplement: 0944.pdf [file 0944.pdf]

SUPPLEMENTAL MATERIAL

FIGURES

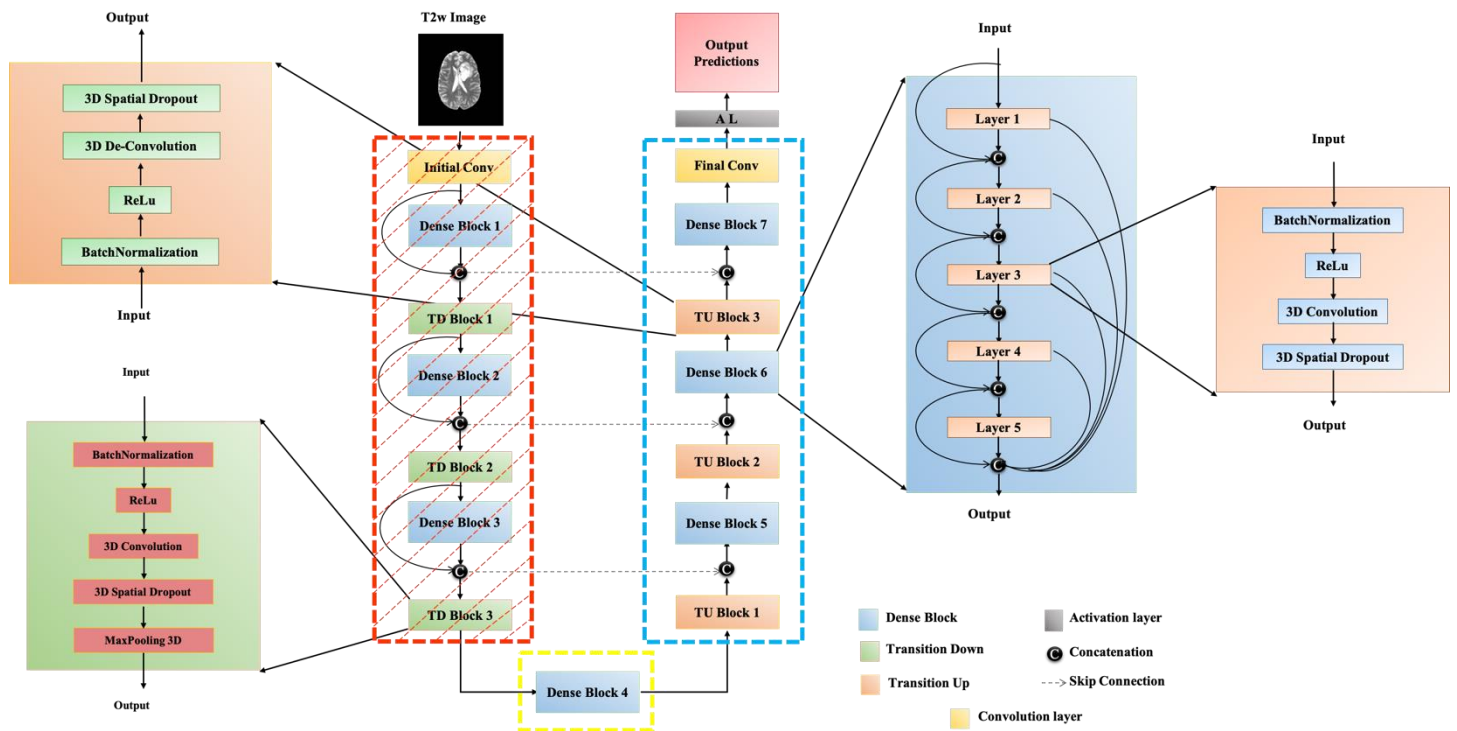

Supporting Figure 1: Detailed network architecture for the MGMT-net. Our previously trained 3D IDH network was used. The left arm of the Dense U-net (striped red box) is the encoder part of the network, the right arm of the network (blue box) is the decoder part and the dense block (yellow box) is the bottle neck block. The encoder part of the network was frozen to retain the pre-trained weights from the 3D IDH network. The bottleneck block and the decoder part of the network was fine-tuned for a dual class segmentation with class 1 & 2 representing methylated & unmethylated MGMT promoter status respectively.

## **ROC methodology**

The network output classifies voxels in the tumor as methylated or unmethylated MGMT promoter type. The percent of methylated voxels was computed for the network output for each subject in the test set by dividing the predicted methylated voxels by the total number of predicted voxels in each tumor. The percent methylated voxels can be viewed as a network output prediction likelihood of the tumor being MGMT methylated. Note that in the manuscript, majority voting (the 50% threshold) was used to determine MGMT promoter status. For the ROC analysis, the percent of methylated voxels was sorted and used as separate thresholds (cut-points) to determine the MGMT promoter status for the subjects across the test set for each new cut-point. The resulting predicted MGMT promoter class membership was compared to the ground truth values to determine sensitivity (true positive rate) and 1- specificity (false positive rate) at each threshold. The resulting values were plotted using R to obtain an ROC curve (true positive rate against false positive rate). R routines were used to fit the curves and determine the area under the curve (AUC). This procedure was repeated for each of the 3 test folds from the cross-validation procedure for the MGMT-net, providing a total of 3 ROC curves from the cross-validation.

# TABLES

Table 1: Subject wise MGMT promoter status and tumor histology

| Subject ID   | Age | Gender | Histology    | Grade | TCGA Data Collection | IDH mutation Status | 1p/19q co-deletion status | MGMT promoter status | Survival (months) | Karnofsky performance scores | Cross-validation group |
|--------------|-----|--------|--------------|-------|----------------------|---------------------|---------------------------|----------------------|-------------------|------------------------------|------------------------|
| TCGA-02-0003 | 50  | male   | glioblastoma | G4    | TCGA-GBM             | WT                  | non-codel                 | Unmethylated         | 4.7311056         | 100                          | 2                      |
| TCGA-02-0006 | 56  | female | glioblastoma | G4    | TCGA-GBM             | WT                  | non-codel                 | Unmethylated         | 18.3330342        | 80                           | 2                      |
| TCGA-02-0009 | 61  | female | glioblastoma | G4    | TCGA-GBM             | WT                  | non-codel                 | Unmethylated         | 10.5792778        | 80                           | 2                      |
| TCGA-02-0011 | 18  | female | glioblastoma | G4    | TCGA-GBM             | WT                  | non-codel                 | Methylated           | 20.698587         | 80                           | 2                      |
| TCGA-02-0027 | 33  | female | glioblastoma | G4    | TCGA-GBM             | WT                  | non-codel                 | Unmethylated         | 12.156313         | 100                          | 2                      |
| TCGA-02-0033 | 54  | male   | glioblastoma | G4    | TCGA-GBM             | WT                  | non-codel                 | Methylated           | 2.8255214         | 100                          | 1                      |
| TCGA-02-0034 | 60  | male   | glioblastoma | G4    | TCGA-GBM             | WT                  | non-codel                 | Unmethylated         | 14.127607         | 80                           | 1                      |
| TCGA-02-0037 | 74  | female | glioblastoma | G4    | TCGA-GBM             | WT                  | non-codel                 | Unmethylated         | 3.614039          | 80                           | 1                      |
| TCGA-02-0046 | 61  | male   | glioblastoma | G4    | TCGA-GBM             | WT                  | non-codel                 | Methylated           | 6.8666741         | 60                           | 1                      |
| TCGA-02-0047 | 78  | male   | glioblastoma | G4    | TCGA-GBM             | WT                  | non-codel                 | Unmethylated         | 14.7189952        | 80                           | 1                      |
| TCGA-02-0060 | 66  | female | glioblastoma | G4    | TCGA-GBM             | WT                  | non-codel                 | Methylated           | 6.0124467         | 80                           | 2                      |
| TCGA-02-0064 | 50  | male   | glioblastoma | G4    | TCGA-GBM             | WT                  | non-codel                 | Methylated           | 19.71294          | 100                          | 3                      |
| TCGA-02-0069 | 31  | female | glioblastoma | G4    | TCGA-GBM             | WT                  | non-codel                 | Methylated           | 28.6823277        | 80                           | 2                      |
| TCGA-02-0075 | 63  | male   | glioblastoma | G4    | TCGA-GBM             | WT                  | non-codel                 | Methylated           | 20.8300066        | 80                           | 2                      |
| TCGA-02-0086 | 45  | female | glioblastoma | G4    | TCGA-GBM             | WT                  | non-codel                 | Unmethylated         | 8.8051132         | 100                          | 2                      |
| TCGA-02-0102 | 42  | male   | glioblastoma | G4    | TCGA-GBM             | WT                  | non-codel                 | Unmethylated         | 27.0067278        | 100                          | 1                      |
| TCGA-06-0119 | 81  | female | glioblastoma | G4    | TCGA-GBM             | WT                  | non-codel                 | Methylated           | 2.6941018         | NA                           | 2                      |
| TCGA-06-0122 | 84  | female | glioblastoma | G4    | TCGA-GBM             | WT                  | non-codel                 | Unmethylated         | 6.1438663         | NA                           | 2                      |
| TCGA-06-0128 | 66  | male   | glioblastoma | G4    | TCGA-GBM             | Mutant              | non-codel                 | Methylated           | 22.7027359        | 80                           | 3                      |
| TCGA-06-0129 | 30  | male   | glioblastoma | G4    | TCGA-GBM             | Mutant              | non-codel                 | Methylated           | 33.6434176        | 100                          | 1                      |
| TCGA-06-0133 | 64  | male   | glioblastoma | G4    | TCGA-GBM             | WT                  | non-codel                 | Unmethylated         | 14.2918815        | NA                           | 2                      |
| TCGA-06-0137 | 63  | female | glioblastoma | G4    | TCGA-GBM             | WT                  | non-codel                 | Unmethylated         | 26.6781788        | NA                           | 2                      |
| TCGA-06-0142 | 81  | male   | glioblastoma | G4    | TCGA-GBM             | WT                  | non-codel                 | Unmethylated         | 2.2012783         | NA                           | 1                      |
| TCGA-06-0143 | 58  | male   | glioblastoma | G4    | TCGA-GBM             | WT                  | non-codel                 | Unmethylated         | 11.7291993        | 60                           | 1                      |
| TCGA-06-0145 | 53  | female | glioblastoma | G4    | TCGA-GBM             | WT                  | non-codel                 | Methylated           | 2.3326979         | NA                           | 1                      |
| TCGA-06-0147 | 51  | female | glioblastoma | G4    | TCGA-GBM             | WT                  | non-codel                 | Methylated           | 17.7745009        | NA                           | 2                      |
| TCGA-06-0148 | 76  | male   | glioblastoma | G4    | TCGA-GBM             | WT                  | non-codel                 | Unmethylated         | 10.0864543        | NA                           | 1                      |
| TCGA-06-0881 | 50  | male   | glioblastoma | G4    | TCGA-GBM             | WT                  | non-codel                 | Unmethylated         | 5.8481722         | 80                           | 1                      |
| TCGA-06-1806 | 47  | male   | glioblastoma | G4    | TCGA-GBM             | WT                  | non-codel                 | Unmethylated         | 15.3103834        | 90                           | 2                      |
| TCGA-06-2570 | 21  | female | glioblastoma | G4    | TCGA-GBM             | Mutant              | non-codel                 | Methylated           | 9.3636465         | 100                          | 1                      |
| TCGA-06-5408 | 54  | female | glioblastoma | G4    | TCGA-GBM             | WT                  | non-codel                 | Unmethylated         | 11.7291993        | 80                           | 3                      |
| TCGA-06-5412 | 78  | female | glioblastoma | G4    | TCGA-GBM             | WT                  | non-codel                 | Methylated           | 4.5339762         | 80                           | 2                      |
| TCGA-06-5413 | 67  | male   | glioblastoma | G4    | TCGA-GBM             | WT                  | non-codel                 | Unmethylated         | 8.8051132         | 60                           | 1                      |
| TCGA-06-5417 | 45  | female | glioblastoma | G4    | TCGA-GBM             | Mutant              | NA                        | Methylated           | 5.0925095         | 80                           | 3                      |
| TCGA-06-6389 | 49  | female | glioblastoma | G4    | TCGA-GBM             | Mutant              | non-codel                 | Methylated           | 7.7866113         | 100                          | 3                      |
| TCGA-12-0829 | 75  | male   | glioblastoma | G4    | TCGA-GBM             | WT                  | non-codel                 | Methylated           | 20.5671674        | 80                           | 2                      |
| TCGA-12-1093 | 66  | female | glioblastoma | G4    | TCGA-GBM             | WT                  | non-codel                 | Unmethylated         | 15.9674814        | 80                           | 1                      |
| TCGA-12-1598 | 75  | female | glioblastoma | G4    | TCGA-GBM             | WT                  | non-codel                 | Methylated           | 15.6389324        | NA                           | 3                      |

|              |    |        |              |    |          |        |           |              |            |     |   |
|--------------|----|--------|--------------|----|----------|--------|-----------|--------------|------------|-----|---|
| TCGA-12-1601 | NA | NA     | NA           | NA | TCGA-GBM | WT     | NA        | Unmethylated | NA         | NA  | 2 |
| TCGA-12-1602 | 58 | male   | glioblastoma | G4 | TCGA-GBM | WT     | non-codel | Methylated   | 6.7681094  | 60  | 2 |
| TCGA-12-3650 | 46 | male   | glioblastoma | G4 | TCGA-GBM | WT     | non-codel | Unmethylated | 10.9406817 | 80  | 3 |
| TCGA-14-0789 | 54 | male   | glioblastoma | G4 | TCGA-GBM | WT     | non-codel | Methylated   | 11.2363758 | 40  | 2 |
| TCGA-14-1456 | 23 | male   | glioblastoma | G4 | TCGA-GBM | Mutant | non-codel | Unmethylated | 40.9372054 | 80  | 3 |
| TCGA-14-1794 | 59 | male   | glioblastoma | G4 | TCGA-GBM | WT     | non-codel | Unmethylated | 0.985647   | NA  | 2 |
| TCGA-14-1829 | 57 | male   | glioblastoma | G4 | TCGA-GBM | WT     | non-codel | Unmethylated | 7.1623682  | 60  | 2 |
| TCGA-14-3477 | 38 | female | glioblastoma | G4 | TCGA-GBM | WT     | non-codel | Unmethylated | 3.7783135  | 80  | 3 |
| TCGA-19-1390 | 63 | female | glioblastoma | G4 | TCGA-GBM | WT     | non-codel | Methylated   | 25.3639828 | 60  | 1 |
| TCGA-19-1789 | 69 | female | glioblastoma | G4 | TCGA-GBM | WT     | non-codel | Methylated   | 3.2526351  | 60  | 2 |
| TCGA-19-1791 | 82 | female | glioblastoma | G4 | TCGA-GBM | WT     | non-codel | Unmethylated | 0.1314196  | NA  | 1 |
| TCGA-19-2620 | 70 | male   | glioblastoma | G4 | TCGA-GBM | WT     | non-codel | Methylated   | 4.8625252  | 40  | 3 |
| TCGA-19-2624 | 51 | male   | glioblastoma | G4 | TCGA-GBM | WT     | non-codel | Unmethylated | 0.1642745  | NA  | 1 |
| TCGA-19-2631 | 74 | female | glioblastoma | G4 | TCGA-GBM | WT     | non-codel | Methylated   | 6.9980937  | 60  | 3 |
| TCGA-19-5953 | 58 | male   | glioblastoma | G4 | TCGA-GBM | WT     | non-codel | Methylated   | 4.7311056  | NA  | 1 |
| TCGA-19-5954 | 72 | female | glioblastoma | G4 | TCGA-GBM | WT     | non-codel | Methylated   | 7.9508858  | 60  | 3 |
| TCGA-19-5958 | 56 | male   | glioblastoma | G4 | TCGA-GBM | WT     | non-codel | Unmethylated | 5.3882036  | 80  | 1 |
| TCGA-27-1830 | 57 | male   | glioblastoma | G4 | TCGA-GBM | WT     | non-codel | Unmethylated | 5.0596546  | 80  | 2 |
| TCGA-27-1835 | 53 | female | glioblastoma | G4 | TCGA-GBM | WT     | non-codel | Methylated   | 21.2899752 | 80  | 1 |
| TCGA-27-1836 | 33 | female | glioblastoma | G4 | TCGA-GBM | WT     | non-codel | Methylated   | 30.0293786 | 80  | 1 |
| TCGA-27-1838 | 59 | female | glioblastoma | G4 | TCGA-GBM | WT     | non-codel | Unmethylated | 11.499215  | 80  | 3 |
| TCGA-76-4925 | 76 | male   | glioblastoma | G4 | TCGA-GBM | WT     | non-codel | Methylated   | 4.7968154  | 100 | 2 |
| TCGA-76-4926 | 68 | male   | glioblastoma | G4 | TCGA-GBM | WT     | non-codel | Unmethylated | 4.5339762  | 80  | 3 |
| TCGA-76-4927 | 58 | male   | glioblastoma | G4 | TCGA-GBM | WT     | NA        | Unmethylated | 17.5773715 | 80  | 2 |
| TCGA-76-4928 | 85 | female | glioblastoma | G4 | TCGA-GBM | WT     | non-codel | Methylated   | 3.0883606  | 80  | 1 |
| TCGA-76-4929 | 76 | female | glioblastoma | G4 | TCGA-GBM | WT     | non-codel | Methylated   | 3.6468939  | 80  | 3 |
| TCGA-76-4931 | 70 | female | glioblastoma | G4 | TCGA-GBM | WT     | non-codel | Unmethylated | 9.1665171  | 80  | 3 |
| TCGA-76-4932 | 50 | female | glioblastoma | G4 | TCGA-GBM | WT     | NA        | Methylated   | 47.9024442 | 80  | 3 |
| TCGA-76-4934 | 66 | female | glioblastoma | G4 | TCGA-GBM | WT     | non-codel | Methylated   | 2.5298273  | 80  | 1 |
| TCGA-76-4935 | 52 | female | glioblastoma | G4 | TCGA-GBM | WT     | non-codel | Methylated   | 10.7764072 | 80  | 2 |
| TCGA-76-6191 | 57 | male   | glioblastoma | G4 | TCGA-GBM | WT     | non-codel | Unmethylated | 16.6902892 | 80  | 3 |
| TCGA-76-6192 | 74 | male   | glioblastoma | G4 | TCGA-GBM | WT     | non-codel | Unmethylated | 3.28549    | 80  | 2 |
| TCGA-76-6193 | 78 | male   | glioblastoma | G4 | TCGA-GBM | WT     | non-codel | Unmethylated | 2.6941018  | 60  | 2 |
| TCGA-76-6280 | 57 | male   | glioblastoma | G4 | TCGA-GBM | WT     | non-codel | Methylated   | 11.3677954 | 80  | 1 |
| TCGA-76-6282 | 63 | male   | glioblastoma | G4 | TCGA-GBM | WT     | non-codel | Unmethylated | 17.0516931 | 80  | 2 |
| TCGA-76-6285 | 64 | female | glioblastoma | G4 | TCGA-GBM | WT     | non-codel | Unmethylated | 8.3451446  | 80  | 3 |
| TCGA-76-6286 | 60 | male   | glioblastoma | G4 | TCGA-GBM | WT     | non-codel | Unmethylated | 20.9614262 | 80  | 1 |
| TCGA-76-6656 | 66 | male   | glioblastoma | G4 | TCGA-GBM | WT     | non-codel | Methylated   | 4.8296703  | 60  | 3 |
| TCGA-76-6657 | 74 | male   | glioblastoma | G4 | TCGA-GBM | WT     | non-codel | Methylated   | 5.0267997  | 80  | 2 |
| TCGA-76-6661 | 54 | male   | glioblastoma | G4 | TCGA-GBM | WT     | non-codel | Unmethylated | 0.2299843  | 60  | 3 |
| TCGA-76-6662 | 58 | male   | glioblastoma | G4 | TCGA-GBM | WT     | non-codel | Unmethylated | 9.2650818  | 80  | 1 |
| TCGA-76-6663 | 44 | female | glioblastoma | G4 | TCGA-GBM | WT     | non-codel | Unmethylated | 7.7209015  | 80  | 3 |
| TCGA-76-6664 | 49 | female | glioblastoma | G4 | TCGA-GBM | WT     | non-codel | Methylated   | 7.7866113  | 80  | 3 |

|              |    |        |                   |    |          |        |           |              |             |     |   |
|--------------|----|--------|-------------------|----|----------|--------|-----------|--------------|-------------|-----|---|
| TCGA-CS-4938 | 31 | female | astrocytoma       | G2 | TCGA-LGG | Mutant | non-codel | Unmethylated | 4.6982507   | 90  | 3 |
| TCGA-CS-4941 | 67 | male   | astrocytoma       | G3 | TCGA-LGG | WT     | non-codel | Methylated   | 7.6880466   | 90  | 1 |
| TCGA-CS-4942 | 44 | female | astrocytoma       | G3 | TCGA-LGG | Mutant | non-codel | Unmethylated | 43.8612915  | 90  | 1 |
| TCGA-CS-4943 | 37 | male   | astrocytoma       | G3 | TCGA-LGG | Mutant | non-codel | Methylated   | 18.1359048  | 50  | 3 |
| TCGA-CS-4944 | 50 | male   | astrocytoma       | G2 | TCGA-LGG | Mutant | non-codel | Methylated   | 10.6121327  | 90  | 2 |
| TCGA-CS-5390 | 47 | female | oligodendroglioma | G2 | TCGA-LGG | Mutant | codel     | Methylated   | 64.5927334  | 100 | 2 |
| TCGA-CS-5393 | 39 | male   | astrocytoma       | G3 | TCGA-LGG | Mutant | non-codel | Methylated   | 40.1486878  | 100 | 2 |
| TCGA-CS-5394 | 40 | male   | astrocytoma       | G3 | TCGA-LGG | Mutant | non-codel | Methylated   | 0.0985647   | NA  | 1 |
| TCGA-CS-5395 | 43 | male   | oligodendroglioma | G2 | TCGA-LGG | WT     | non-codel | Unmethylated | 20.9942811  | 90  | 1 |
| TCGA-CS-5396 | 53 | female | oligodendroglioma | G3 | TCGA-LGG | Mutant | codel     | Methylated   | 9.9550347   | 90  | 3 |
| TCGA-CS-5397 | 54 | female | astrocytoma       | G3 | TCGA-LGG | WT     | non-codel | Unmethylated | 6.3738506   | 80  | 2 |
| TCGA-CS-6186 | 58 | male   | oligoastrocytoma  | G3 | TCGA-LGG | WT     | non-codel | Unmethylated | 17.6759362  | 90  | 1 |
| TCGA-CS-6188 | 48 | male   | astrocytoma       | G3 | TCGA-LGG | WT     | non-codel | Unmethylated | 23.8198025  | 90  | 2 |
| TCGA-CS-6290 | 31 | male   | astrocytoma       | G3 | TCGA-LGG | Mutant | non-codel | Methylated   | 17.9387754  | 90  | 1 |
| TCGA-CS-6665 | 51 | female | astrocytoma       | G3 | TCGA-LGG | Mutant | non-codel | Methylated   | 12.4191522  | 90  | 3 |
| TCGA-CS-6666 | 22 | male   | astrocytoma       | G3 | TCGA-LGG | Mutant | non-codel | Methylated   | 8.4765642   | 90  | 2 |
| TCGA-CS-6667 | 39 | female | astrocytoma       | G2 | TCGA-LGG | Mutant | non-codel | Methylated   | 7.556627    | 90  | 1 |
| TCGA-CS-6668 | 57 | female | oligodendroglioma | G2 | TCGA-LGG | Mutant | codel     | Methylated   | 8.0165956   | 90  | 1 |
| TCGA-CS-6669 | 26 | female | oligodendroglioma | G2 | TCGA-LGG | WT     | non-codel | Unmethylated | 7.3923525   | 90  | 3 |
| TCGA-DU-5849 | 48 | male   | oligodendroglioma | G2 | TCGA-LGG | Mutant | codel     | Methylated   | 14.5547207  | NA  | 1 |
| TCGA-DU-5851 | 40 | female | oligoastrocytoma  | G3 | TCGA-LGG | Mutant | non-codel | Unmethylated | 17.4459519  | 90  | 3 |
| TCGA-DU-5852 | 61 | female | oligoastrocytoma  | G3 | TCGA-LGG | WT     | non-codel | Methylated   | 6.7352545   | 80  | 3 |
| TCGA-DU-5853 | 29 | male   | oligoastrocytoma  | G2 | TCGA-LGG | Mutant | non-codel | Methylated   | 13.3719443  | 100 | 2 |
| TCGA-DU-5854 | 57 | female | astrocytoma       | G3 | TCGA-LGG | WT     | non-codel | Unmethylated | 8.4437093   | 90  | 2 |
| TCGA-DU-5855 | 49 | female | oligoastrocytoma  | G3 | TCGA-LGG | Mutant | non-codel | Methylated   | 6.8009643   | 100 | 2 |
| TCGA-DU-5871 | 37 | female | oligoastrocytoma  | G2 | TCGA-LGG | Mutant | non-codel | Methylated   | 18.9244224  | 100 | 3 |
| TCGA-DU-5872 | 43 | female | oligoastrocytoma  | G2 | TCGA-LGG | Mutant | non-codel | Methylated   | 17.4788068  | NA  | 2 |
| TCGA-DU-5874 | 62 | female | oligodendroglioma | G2 | TCGA-LGG | Mutant | codel     | Methylated   | 15.1461089  | 100 | 3 |
| TCGA-DU-6395 | 31 | male   | oligoastrocytoma  | G2 | TCGA-LGG | Mutant | non-codel | Methylated   | 48.9866559  | NA  | 1 |
| TCGA-DU-6397 | 45 | male   | oligodendroglioma | G3 | TCGA-LGG | Mutant | codel     | Methylated   | 46.0297149  | NA  | 2 |
| TCGA-DU-6399 | 54 | male   | oligodendroglioma | G2 | TCGA-LGG | Mutant | non-codel | Methylated   | 65.7098     | NA  | 1 |
| TCGA-DU-6400 | 66 | female | oligodendroglioma | G2 | TCGA-LGG | Mutant | codel     | Methylated   | 1.2156313   | NA  | 3 |
| TCGA-DU-6401 | 31 | female | oligodendroglioma | G2 | TCGA-LGG | Mutant | non-codel | Methylated   | 87.394034   | NA  | 3 |
| TCGA-DU-6404 | 24 | female | oligodendroglioma | G3 | TCGA-LGG | WT     | non-codel | Unmethylated | 133.6537332 | 100 | 3 |
| TCGA-DU-6405 | 51 | female | astrocytoma       | G3 | TCGA-LGG | WT     | non-codel | Methylated   | 19.8772145  | 90  | 3 |
| TCGA-DU-6407 | 35 | female | oligodendroglioma | G2 | TCGA-LGG | Mutant | non-codel | Methylated   | 94.4578375  | 90  | 3 |
| TCGA-DU-6408 | 23 | female | oligodendroglioma | G3 | TCGA-LGG | Mutant | non-codel | Methylated   | 114.006503  | 90  | 1 |
| TCGA-DU-7008 | 41 | female | oligodendroglioma | G2 | TCGA-LGG | Mutant | non-codel | Methylated   | 156.1264848 | NA  | 1 |
| TCGA-DU-7010 | 58 | female | astrocytoma       | G3 | TCGA-LGG | Mutant | non-codel | Methylated   | 14.9818344  | NA  | 3 |
| TCGA-DU-7013 | 59 | male   | astrocytoma       | G3 | TCGA-LGG | WT     | non-codel | Unmethylated | 8.8379681   | 80  | 1 |
| TCGA-DU-7015 | 41 | female | oligodendroglioma | G2 | TCGA-LGG | Mutant | non-codel | Methylated   | 90.7123789  | 90  | 2 |
| TCGA-DU-7018 | 57 | female | oligodendroglioma | G3 | TCGA-LGG | Mutant | codel     | Methylated   | 30.6536217  | 90  | 1 |
| TCGA-DU-7019 | 39 | male   | oligoastrocytoma  | G3 | TCGA-LGG | Mutant | non-codel | Methylated   | 26.28392    | 100 | 1 |

|              |    |        |                   |    |          |        |            |              |            |     |   |
|--------------|----|--------|-------------------|----|----------|--------|------------|--------------|------------|-----|---|
| TCGA-DU-7294 | 53 | female | oligodendroglioma | G2 | TCGA-LGG | Mutant | coding     | Methylated   | 94.2607081 | 100 | 1 |
| TCGA-DU-7298 | 38 | female | astrocytoma       | G3 | TCGA-LGG | Mutant | non-coding | Methylated   | 18.9244224 | 80  | 2 |
| TCGA-DU-7299 | 33 | male   | astrocytoma       | G3 | TCGA-LGG | Mutant | non-coding | Methylated   | 43.9927111 | 90  | 3 |
| TCGA-DU-7300 | 53 | female | oligodendroglioma | G3 | TCGA-LGG | Mutant | coding     | Methylated   | 61.9643414 | 90  | 3 |
| TCGA-DU-7301 | 53 | male   | oligodendroglioma | G2 | TCGA-LGG | Mutant | non-coding | Methylated   | 25.8896612 | 100 | 3 |
| TCGA-DU-7302 | 48 | female | oligodendroglioma | G3 | TCGA-LGG | Mutant | coding     | Methylated   | 60.2558866 | 90  | 1 |
| TCGA-DU-7304 | 43 | male   | oligoastrocytoma  | G3 | TCGA-LGG | Mutant | non-coding | Methylated   | 23.2941241 | 80  | 3 |
| TCGA-DU-7306 | 67 | male   | oligoastrocytoma  | G2 | TCGA-LGG | Mutant | non-coding | Methylated   | 41.9557073 | 100 | 1 |
| TCGA-DU-7309 | 41 | female | oligodendroglioma | G3 | TCGA-LGG | Mutant | non-coding | Methylated   | 2.7598116  | 90  | 3 |
| TCGA-DU-8158 | 57 | female | astrocytoma       | G3 | TCGA-LGG | WT     | non-coding | Unmethylated | 5.0925095  | 80  | 3 |
| TCGA-DU-8162 | 61 | female | oligoastrocytoma  | G3 | TCGA-LGG | WT     | non-coding | Unmethylated | 14.5875756 | 80  | 1 |
| TCGA-DU-8164 | 51 | male   | oligodendroglioma | G2 | TCGA-LGG | Mutant | coding     | Methylated   | 21.3885399 | NA  | 1 |
| TCGA-DU-8165 | 60 | female | oligodendroglioma | G3 | TCGA-LGG | WT     | non-coding | Unmethylated | 19.1215518 | 90  | 1 |
| TCGA-DU-8166 | 29 | female | oligoastrocytoma  | G2 | TCGA-LGG | Mutant | non-coding | Methylated   | 16.9531284 | NA  | 2 |
| TCGA-DU-8167 | 69 | female | oligoastrocytoma  | G2 | TCGA-LGG | Mutant | non-coding | Methylated   | 15.4746579 | 100 | 3 |
| TCGA-DU-8168 | 55 | female | oligodendroglioma | G3 | TCGA-LGG | Mutant | coding     | Methylated   | 14.1604619 | 70  | 3 |
| TCGA-DU-A5TP | 33 | male   | astrocytoma       | G3 | TCGA-LGG | Mutant | non-coding | Methylated   | 14.2261717 | 70  | 2 |
| TCGA-DU-A5TR | 51 | male   | oligoastrocytoma  | G2 | TCGA-LGG | Mutant | non-coding | Methylated   | 12.5834267 | 90  | 2 |
| TCGA-DU-A5TS | 42 | male   | oligodendroglioma | G2 | TCGA-LGG | Mutant | non-coding | Methylated   | 15.113254  | 100 | 2 |
| TCGA-DU-A5TT | 70 | male   | oligodendroglioma | G3 | TCGA-LGG | WT     | non-coding | Methylated   | 4.9610899  | NA  | 2 |
| TCGA-DU-A5TU | 62 | female | astrocytoma       | G2 | TCGA-LGG | Mutant | non-coding | Methylated   | 3.6468939  | 50  | 1 |
| TCGA-DU-A5TW | 33 | female | astrocytoma       | G3 | TCGA-LGG | Mutant | non-coding | Methylated   | 5.6510428  | 100 | 2 |
| TCGA-DU-A5TY | 46 | female | astrocytoma       | G3 | TCGA-LGG | WT     | non-coding | Methylated   | 12.1891679 | NA  | 2 |
| TCGA-DU-A6S2 | 37 | female | oligodendroglioma | G2 | TCGA-LGG | Mutant | coding     | Methylated   | 8.6408387  | 70  | 2 |
| TCGA-DU-A6S3 | 60 | male   | oligodendroglioma | G2 | TCGA-LGG | Mutant | coding     | Methylated   | 2.6941018  | NA  | 3 |
| TCGA-DU-A6S6 | 35 | female | oligoastrocytoma  | G2 | TCGA-LGG | Mutant | coding     | Methylated   | 77.9318228 | 90  | 1 |
| TCGA-DU-A6S7 | 27 | female | astrocytoma       | G3 | TCGA-LGG | Mutant | non-coding | Methylated   | 7.228078   | 90  | 2 |
| TCGA-DU-A6S8 | 74 | female | oligodendroglioma | G3 | TCGA-LGG | Mutant | coding     | Methylated   | 5.9795918  | 90  | 2 |
| TCGA-FG-5963 | 23 | male   | astrocytoma       | G3 | TCGA-LGG | WT     | non-coding | Unmethylated | 25.4625475 | 90  | 2 |
| TCGA-FG-5964 | 62 | male   | oligodendroglioma | G2 | TCGA-LGG | Mutant | coding     | Methylated   | 34.3333705 | NA  | 1 |
| TCGA-FG-6688 | 59 | female | astrocytoma       | G3 | TCGA-LGG | WT     | non-coding | Methylated   | 18.7601479 | 80  | 2 |
| TCGA-FG-6689 | 30 | male   | astrocytoma       | G2 | TCGA-LGG | Mutant | non-coding | Methylated   | 14.9161246 | 70  | 3 |
| TCGA-FG-6690 | 70 | male   | oligodendroglioma | G2 | TCGA-LGG | Mutant | non-coding | Methylated   | 24.969724  | 90  | 2 |
| TCGA-FG-6691 | 23 | female | astrocytoma       | G2 | TCGA-LGG | Mutant | non-coding | Unmethylated | 23.9512221 | 100 | 3 |
| TCGA-FG-6692 | 63 | male   | oligodendroglioma | G3 | TCGA-LGG | WT     | non-coding | Methylated   | 18.4315989 | NA  | 1 |
| TCGA-FG-7634 | 28 | male   | oligodendroglioma | G2 | TCGA-LGG | Mutant | coding     | Methylated   | 15.3432383 | NA  | 1 |
| TCGA-FG-7637 | 49 | male   | oligoastrocytoma  | G2 | TCGA-LGG | Mutant | non-coding | Methylated   | 40.0501231 | NA  | 1 |
| TCGA-FG-8189 | 33 | female | oligodendroglioma | G2 | TCGA-LGG | Mutant | non-coding | Methylated   | 11.8606189 | 70  | 3 |
| TCGA-FG-A4MT | 27 | female | oligodendroglioma | G2 | TCGA-LGG | Mutant | non-coding | Methylated   | 38.2431036 | 100 | 2 |
| TCGA-FG-A4MU | 58 | male   | oligoastrocytoma  | G3 | TCGA-LGG | WT     | non-coding | Methylated   | 0.5913882  | NA  | 1 |
| TCGA-FG-A6IZ | 60 | male   | oligodendroglioma | G2 | TCGA-LGG | Mutant | coding     | Methylated   | 4.2054272  | NA  | 3 |
| TCGA-FG-A6J1 | 44 | female | oligodendroglioma | G2 | TCGA-LGG | Mutant | coding     | Methylated   | 4.0740076  | 70  | 2 |
| TCGA-FG-A713 | 74 | female | oligoastrocytoma  | G2 | TCGA-LGG | Mutant | coding     | Methylated   | 5.2239291  | 60  | 3 |

|              |    |        |                   |    |          |        |           |              |            |     |   |
|--------------|----|--------|-------------------|----|----------|--------|-----------|--------------|------------|-----|---|
| TCGA-FG-A87N | 37 | female | astrocytoma       | G3 | TCGA-LGG | Mutant | non-codel | Methylated   | 7.4252074  | NA  | 3 |
| TCGA-HT-7468 | 30 | male   | oligodendroglioma | G3 | TCGA-LGG | Mutant | codel     | Methylated   | 6.6695447  | 80  | 1 |
| TCGA-HT-7469 | 30 | male   | oligodendroglioma | G3 | TCGA-LGG | WT     | non-codel | Methylated   | 11.5320699 | NA  | 1 |
| TCGA-HT-7471 | 37 | female | oligodendroglioma | G3 | TCGA-LGG | Mutant | codel     | Methylated   | 0.1314196  | NA  | 2 |
| TCGA-HT-7472 | 38 | male   | oligodendroglioma | G2 | TCGA-LGG | Mutant | non-codel | Methylated   | 0.0328549  | NA  | 1 |
| TCGA-HT-7473 | 28 | male   | oligoastrocytoma  | G2 | TCGA-LGG | Mutant | non-codel | Unmethylated | 16.5260147 | NA  | 3 |
| TCGA-HT-7475 | 67 | male   | oligoastrocytoma  | G3 | TCGA-LGG | Mutant | non-codel | Methylated   | 17.413097  | 70  | 3 |
| TCGA-HT-7476 | 26 | male   | astrocytoma       | G2 | TCGA-LGG | Mutant | non-codel | Methylated   | 6.5381251  | NA  | 1 |
| TCGA-HT-7478 | 36 | male   | astrocytoma       | G2 | TCGA-LGG | Mutant | non-codel | Unmethylated | 6.3738506  | NA  | 1 |
| TCGA-HT-7481 | 39 | male   | oligodendroglioma | G2 | TCGA-LGG | Mutant | codel     | Methylated   | 59.13882   | NA  | 2 |
| TCGA-HT-7602 | 21 | male   | oligodendroglioma | G2 | TCGA-LGG | Mutant | non-codel | Methylated   | 29.8322492 | NA  | 2 |
| TCGA-HT-7603 | 29 | male   | oligodendroglioma | G2 | TCGA-LGG | Mutant | non-codel | Methylated   | 23.1627045 | NA  | 2 |
| TCGA-HT-7605 | 38 | male   | oligodendroglioma | G2 | TCGA-LGG | Mutant | codel     | Methylated   | 4.5668311  | NA  | 3 |
| TCGA-HT-7606 | 30 | female | astrocytoma       | G2 | TCGA-LGG | Mutant | non-codel | Unmethylated | 17.2816774 | NA  | 1 |
| TCGA-HT-7608 | 61 | male   | oligoastrocytoma  | G2 | TCGA-LGG | Mutant | codel     | Methylated   | 22.0456379 | NA  | 2 |
| TCGA-HT-7616 | 75 | male   | oligodendroglioma | G3 | TCGA-LGG | Mutant | codel     | Methylated   | 0.2299843  | NA  | 3 |
| TCGA-HT-7680 | 32 | female | astrocytoma       | G2 | TCGA-LGG | WT     | non-codel | Unmethylated | 0.7556627  | NA  | 3 |
| TCGA-HT-7684 | 58 | male   | oligoastrocytoma  | G3 | TCGA-LGG | Mutant | non-codel | Methylated   | 6.0453016  | NA  | 3 |
| TCGA-HT-7686 | 29 | female | astrocytoma       | G3 | TCGA-LGG | Mutant | non-codel | Methylated   | 42.71137   | NA  | 3 |
| TCGA-HT-7690 | 29 | male   | oligoastrocytoma  | G3 | TCGA-LGG | Mutant | non-codel | Methylated   | 0.0985647  | NA  | 3 |
| TCGA-HT-7692 | 43 | male   | oligoastrocytoma  | G2 | TCGA-LGG | Mutant | codel     | Methylated   | 2.956941   | 100 | 1 |
| TCGA-HT-7693 | 51 | female | oligodendroglioma | G2 | TCGA-LGG | Mutant | non-codel | Methylated   | 17.5116617 | 90  | 1 |
| TCGA-HT-7694 | 60 | male   | oligodendroglioma | G3 | TCGA-LGG | Mutant | codel     | Methylated   | 6.899529   | 90  | 2 |
| TCGA-HT-7695 | 29 | female | oligodendroglioma | G2 | TCGA-LGG | Mutant | codel     | Methylated   | 14.5218658 | NA  | 1 |
| TCGA-HT-7854 | 62 | male   | astrocytoma       | G2 | TCGA-LGG | WT     | non-codel | Unmethylated | 39.4587349 | 100 | 3 |
| TCGA-HT-7855 | 39 | male   | astrocytoma       | G3 | TCGA-LGG | Mutant | non-codel | Methylated   | 19.2201165 | NA  | 2 |
| TCGA-HT-7856 | 35 | male   | oligodendroglioma | G3 | TCGA-LGG | Mutant | codel     | Methylated   | 39.0644761 | NA  | 2 |
| TCGA-HT-7860 | 60 | female | astrocytoma       | G3 | TCGA-LGG | WT     | non-codel | Methylated   | 0.4928235  | NA  | 2 |
| TCGA-HT-7874 | 41 | female | oligodendroglioma | G3 | TCGA-LGG | Mutant | codel     | Methylated   | 37.126037  | NA  | 1 |
| TCGA-HT-7877 | 20 | female | oligodendroglioma | G2 | TCGA-LGG | Mutant | codel     | Methylated   | 0.1314196  | NA  | 3 |
| TCGA-HT-7879 | 31 | male   | oligoastrocytoma  | G3 | TCGA-LGG | Mutant | non-codel | Methylated   | 3.6797488  | NA  | 1 |
| TCGA-HT-7880 | 30 | male   | oligoastrocytoma  | G2 | TCGA-LGG | Mutant | non-codel | Methylated   | 5.3224938  | NA  | 3 |
| TCGA-HT-7882 | 66 | male   | oligodendroglioma | G3 | TCGA-LGG | WT     | non-codel | Methylated   | 3.7126037  | NA  | 2 |
| TCGA-HT-7884 | 44 | female | astrocytoma       | G2 | TCGA-LGG | Mutant | non-codel | Methylated   | 11.2692307 | 80  | 1 |
| TCGA-HT-7902 | 30 | female | oligoastrocytoma  | G2 | TCGA-LGG | Mutant | non-codel | Methylated   | 31.4092844 | NA  | 3 |
| TCGA-HT-8010 | 64 | female | oligodendroglioma | G2 | TCGA-LGG | Mutant | codel     | Methylated   | 1.642745   | NA  | 3 |
| TCGA-HT-8013 | 37 | female | oligoastrocytoma  | G2 | TCGA-LGG | Mutant | non-codel | Methylated   | 63.5085217 | NA  | 1 |
| TCGA-HT-8015 | 21 | male   | astrocytoma       | G2 | TCGA-LGG | WT     | non-codel | Unmethylated | 0.0985647  | NA  | 1 |
| TCGA-HT-8018 | 40 | female | oligoastrocytoma  | G2 | TCGA-LGG | Mutant | non-codel | Methylated   | 21.4871046 | NA  | 3 |
| TCGA-HT-8019 | 34 | female | oligodendroglioma | G3 | TCGA-LGG | WT     | non-codel | Unmethylated | 32.9863196 | NA  | 1 |
| TCGA-HT-8105 | 54 | male   | oligodendroglioma | G3 | TCGA-LGG | Mutant | codel     | Methylated   | 6.242431   | NA  | 3 |
| TCGA-HT-8106 | 53 | male   | astrocytoma       | G3 | TCGA-LGG | Mutant | non-codel | Methylated   | 0.0985647  | NA  | 1 |
| TCGA-HT-8107 | 62 | male   | oligodendroglioma | G2 | TCGA-LGG | WT     | non-codel | Methylated   | 0.4599686  | NA  | 2 |

|              |    |        |                   |    |          |        |           |              |            |    |   |
|--------------|----|--------|-------------------|----|----------|--------|-----------|--------------|------------|----|---|
| TCGA-HT-8108 | 26 | female | oligodendroglioma | G2 | TCGA-LGG | Mutant | non-codel | Methylated   | 2.4969724  | NA | 1 |
| TCGA-HT-8111 | 32 | male   | oligoastrocytoma  | G3 | TCGA-LGG | Mutant | non-codel | Methylated   | 0.2299843  | NA | 2 |
| TCGA-HT-8113 | 49 | female | oligodendroglioma | G2 | TCGA-LGG | Mutant | non-codel | Methylated   | 29.56941   | NA | 3 |
| TCGA-HT-8114 | 36 | male   | oligoastrocytoma  | G3 | TCGA-LGG | Mutant | non-codel | Methylated   | 3.8768782  | NA | 2 |
| TCGA-HT-8558 | 29 | female | oligodendroglioma | G2 | TCGA-LGG | WT     | non-codel | Unmethylated | 1.7084548  | NA | 2 |
| TCGA-HT-8563 | 30 | female | astrocytoma       | G3 | TCGA-LGG | Mutant | non-codel | Unmethylated | 16.0331912 | NA | 3 |
| TCGA-HT-8564 | 47 | male   | astrocytoma       | G3 | TCGA-LGG | WT     | non-codel | Unmethylated | 15.7046422 | 80 | 2 |
| TCGA-HT-A4DS | 55 | female | astrocytoma       | G3 | TCGA-LGG | WT     | non-codel | Unmethylated | 0.2299843  | NA | 2 |
| TCGA-HT-A5R5 | 33 | female | oligodendroglioma | G2 | TCGA-LGG | Mutant | non-codel | Methylated   | 0.1314196  | NA | 2 |
| TCGA-HT-A5RB | 24 | male   | astrocytoma       | G2 | TCGA-LGG | Mutant | non-codel | Methylated   | 0.0985647  | NA | 1 |
| TCGA-HT-A5RC | 70 | female | astrocytoma       | G3 | TCGA-LGG | WT     | non-codel | Unmethylated | 5.3224938  | 40 | 2 |
| TCGA-HT-A616 | 36 | female | astrocytoma       | G2 | TCGA-LGG | Mutant | non-codel | Methylated   | 1.8070195  | NA | 3 |
| TCGA-HT-A61A | 20 | female | oligodendroglioma | G2 | TCGA-LGG | Mutant | non-codel | Methylated   | 6.3738506  | 80 | 3 |
| TCGA-HT-A61B | NA | NA     | NA                | NA | TCGA-LGG | Mutant | non-codel | Methylated   | NA         | NA | 2 |
| W1_19961025  | NA | NA     | NA                | NA | NA       | NA     | NA        | Unmethylated | NA         | NA | 2 |
| W10_19970429 | NA | NA     | NA                | NA | NA       | NA     | NA        | Methylated   | NA         | NA | 1 |
| W12_19970620 | NA | NA     | NA                | NA | NA       | NA     | NA        | Unmethylated | NA         | NA | 3 |
| W13_19970822 | NA | NA     | NA                | NA | NA       | NA     | NA        | Unmethylated | NA         | NA | 3 |
| W16_19971015 | NA | NA     | NA                | NA | NA       | NA     | NA        | Unmethylated | NA         | NA | 1 |
| W18_19971110 | NA | NA     | NA                | NA | NA       | NA     | NA        | Methylated   | NA         | NA | 1 |
| W2_19961101  | NA | NA     | NA                | NA | NA       | NA     | NA        | Methylated   | NA         | NA | 3 |
| W20_19970516 | NA | NA     | NA                | NA | NA       | NA     | NA        | Unmethylated | NA         | NA | 1 |
| W21_19980105 | NA | NA     | NA                | NA | NA       | NA     | NA        | Unmethylated | NA         | NA | 2 |
| W22_19980102 | NA | NA     | NA                | NA | NA       | NA     | NA        | Methylated   | NA         | NA | 1 |
| W29_19980521 | NA | NA     | NA                | NA | NA       | NA     | NA        | Unmethylated | NA         | NA | 3 |
| W30_19980608 | NA | NA     | NA                | NA | NA       | NA     | NA        | Methylated   | NA         | NA | 2 |
| W31_19980629 | NA | NA     | NA                | NA | NA       | NA     | NA        | Unmethylated | NA         | NA | 3 |
| W32_19980701 | NA | NA     | NA                | NA | NA       | NA     | NA        | Methylated   | NA         | NA | 3 |
| W33_19980704 | NA | NA     | NA                | NA | NA       | NA     | NA        | Methylated   | NA         | NA | 3 |
| W34_19980713 | NA | NA     | NA                | NA | NA       | NA     | NA        | Unmethylated | NA         | NA | 2 |
| W36_19980714 | NA | NA     | NA                | NA | NA       | NA     | NA        | Unmethylated | NA         | NA | 1 |
| W38_19980910 | NA | NA     | NA                | NA | NA       | NA     | NA        | Methylated   | NA         | NA | 2 |
| W39_19980919 | NA | NA     | NA                | NA | NA       | NA     | NA        | Methylated   | NA         | NA | 1 |
| W5_19961211  | NA | NA     | NA                | NA | NA       | NA     | NA        | Unmethylated | NA         | NA | 3 |
| W54_20000902 | NA | NA     | NA                | NA | NA       | NA     | NA        | Unmethylated | NA         | NA | 3 |
| W7_19961218  | NA | NA     | NA                | NA | NA       | NA     | NA        | Methylated   | NA         | NA | 1 |
| W9_19970410  | NA | NA     | NA                | NA | NA       | NA     | NA        | Unmethylated | NA         | NA | 3 |
